# Supplementary material for: Base-free Knoevenagel condensation catalyzed by copper metal surfaces
Source: Royal Society of Chemistry journal article supplement (doi:10.1039/c5cc02541a), 2015-01-01

## Supporting Information

# **Base-free Knoevenagel condensation catalyzed by copper metal surfaces**

E. M. Schneider, M. Zeltner, N. Kränzlin, R.N. Grass, W. J. Stark\*

Institute for Chemical and Bioengineering, ETH Zurich, Vladimir-Prelog-Weg 1, 8093 Zurich, Switzerland

\*E-mail: [Wendelin.stark@chem.ethz.ch](mailto:Wendelin.stark@chem.ethz.ch)

---

## Contents

|                                                                                  |    |
|----------------------------------------------------------------------------------|----|
| 1. General information .....                                                     | 4  |
| 2. Experimental procedures.....                                                  | 5  |
| 2.0 Additional substrate scope .....                                             | 5  |
| 2.1 General procedure for the Cu(0) catalyzed Knoevenagel condensation .....     | 6  |
| 2.2 Characterization of Knoevenagel products.....                                | 6  |
| 2.2.1 Ethyl (Z)-2-cyano-3-phenylacrylate.....                                    | 6  |
| 2.2.2 Benzylidenemalononitrile .....                                             | 7  |
| 2.2.3 Ethyl 2-cyano-3-(4-methoxyphenyl)acrylate .....                            | 7  |
| 2.2.4 Ethyl (2-cyano-3-(4-nitrophenyl)acrylate.....                              | 8  |
| 2.2.5 Ethyl 2-cyano-5-phenylpenta-2,4-dienoate .....                             | 8  |
| 2.2.6 Ethyl 3-(anthracen-9-yl)-2-cyanoacrylate.....                              | 9  |
| 2.2.7 Ethyl 3-([1,1'-biphenyl]-4-yl)-2-cyanoacrylate .....                       | 9  |
| 2.2.8 2-cyano-3-phenylacrylamide.....                                            | 10 |
| 2.2.9 ethyl-3-(4-bromophenyl)-2-cyanoacrylate .....                              | 10 |
| 2.2.10 ethyl-3-(4-chlorophenyl)-2-cyanoacrylate .....                            | 11 |
| 2.2.11 ethyl-3-(4-iodophenyl)-2-cyanoacrylate .....                              | 11 |
| 2.2.12 2,2'-(phenylmethylene)bis(3-hydroxycyclohex-2-en-1-one).....              | 12 |
| 2.2.13 2,2'-(phenylmethylene)bis(3-hydroxy-5,5-dimethylcyclohex-2-en-1-one)..... | 12 |
| 3. Copper catalyst properties .....                                              | 13 |
| 4. Catalytic cycles and kinetic figures .....                                    | 14 |
| 5. SEM micrographs.....                                                          | 16 |
| 6. Scale up documentation .....                                                  | 18 |
| 7. XRD Measurement.....                                                          | 19 |
| 8. NMR spectra .....                                                             | 20 |
| 8.1 Ethyl (Z)-2-cyano-3-phenylacrylate in CDCl <sub>3</sub> .....                | 20 |
| 8.2 Benzylidenemalononitrile in CDCl <sub>3</sub> .....                          | 21 |
| 8.3 Ethyl 2-cyano-3-(4-methoxyphenyl)acrylate .....                              | 22 |
| 8.4 Ethyl (2-cyano-3-(4-nitrophenyl)acrylate.....                                | 23 |

|                                                                                    |    |
|------------------------------------------------------------------------------------|----|
| 8.5 Ethyl 2-cyano-5-phenylpenta-2,4-dienoate .....                                 | 24 |
| 8.6 Ethyl 3-(anthracen-9-yl)-2-cyanoacrylate .....                                 | 25 |
| 8.7 Ethyl 3-([1,1'-biphenyl]-4-yl)-2-cyanoacrylate .....                           | 26 |
| 8.8. 2-cyano-3-phenylacrylamide .....                                              | 27 |
| 8.9. ethyl-3-(4-bromophenyl)-2-cyanoacrylate .....                                 | 28 |
| 8.10. ethyl-3-(4-chlorophenyl)-2-cyanoacrylate .....                               | 29 |
| 8.11 ethyl-3-(4-iodophenyl)-2-cyanoacrylate .....                                  | 30 |
| 8.12 2,2'-(phenylmethylene)bis(3-hydroxy-5,5-dimethylcyclohex-2-en-1-one)<br>..... | 31 |

## 1. General information

Commercially available reagents were used as received from Sigma-Aldrich. Nanoparticles A were purchased from Sigma-Aldrich. Nanoparticles B were purchased from Alfa-Aesar. All air-sensitive reactions were carried out under an argon atmosphere. HPLC measurements were conducted on an AGILENT 1100 (WATERS Column C18, particle size, 5  $\mu\text{m}$ ; column size, 2.1  $\times$  150 mm<sup>2</sup>) to determine the yield of the catalytic reactions. GC-MS measurements were performed (capillary, 30 m  $\times$  250  $\times$  0.5  $\mu\text{m}^2$ ) with split injection (250  $^{\circ}\text{C}$ ; ratio = 10:1; injection volume, 1  $\mu\text{L}$ ) and a temperature program (80  $^{\circ}\text{C}$  for 2 min; increase at 20  $^{\circ}\text{C min}^{-1}$  until 300  $^{\circ}\text{C}$ ). The copper concentration present in solution was measured by inductively coupled plasma-atomic emission spectroscopy (ULTIMA ICPOES). <sup>1</sup>H NMR (200 MHz) were recorded on a Bruker AMX-200 spectrometer and reported in ppm ( $\delta$ ). NMR spectroscopy abbreviations: br, broad; s, singlet; d, doublet; t, triplet; q, quartet; m, multiplet. XRD measurements were performed on a X'Pert Pro-MPD diffractometer (PANalytical), using Cu-K $\alpha$  radiation ( $\lambda = 1.54060 \text{ \AA}$ ), generally over a range of 70 $^{\circ}$  2 $\theta$  with a step size of 0.05 $^{\circ}$ . Scanning electron microscopy (SEM) micrographs were measured on a FEI Nova NanoSEM 450, 5 kV. Brunauer-E Emmett-Teller (BET) measurements were done on a Micromeritics TRISTAR surface analyzer.

## 2. Experimental procedures

### 2.0 Additional substrate scope

Table 1. Additional Substrate scope<sup>a</sup>

| Entry          | Reactant | Reactant                                                                           | Product                                                                            | Yield (%) <sup>b</sup> |
|----------------|----------|------------------------------------------------------------------------------------|------------------------------------------------------------------------------------|------------------------|
| 1 <sup>c</sup> | 2a       | 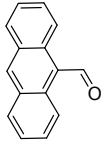  |   | 54 (32) <sup>d</sup>   |
| 2 <sup>c</sup> | 2a       |   |  | 64 (55) <sup>d</sup>   |
| 3              | 2a       |  |  | 42                     |

<sup>a</sup>Reaction conditions: Cu (20 mg), aldehyde (0.21 mmol) and active methylene (0.2 mmol) in EtOH for 6 h at 56 °C. <sup>b</sup>Yield determined via HPLC-UV or GC-FID. <sup>c</sup>Stirred for 16 h. <sup>d</sup>Isolated yield.

## 2.1 General procedure for the Cu(0) catalyzed Knoevenagel condensation

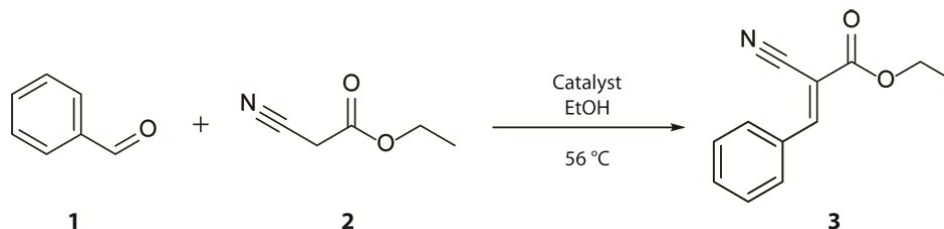

A mixture of solvent (1 mL) and catalyst (4 mg) was prepared in an Eppendorf-tube. Aldehyde or ketone (0.11 mMol) and active methylene compound (0.1 mMol) were added and the whole reaction mixture was shaken at 56 °C for 2 h. The residue was filtrated using a standard frit and 3 g of aluminum oxide (removing solvated Cu(II) ions) and the solvent was removed under reduced pressure. The resulting solid was dissolved in hot EtOH and recrystallized at 8 °C.

## 2.2 Characterization of Knoevenagel products

### 2.2.1 Ethyl-2-cyano-3-phenylacrylate

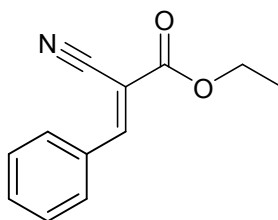

Ethyl (Z)-2-cyano-3-phenylacrylate was prepared from benzaldehyde (0.12 mmol) and cyano 2-ethylacetate (0.1 mmol) following the general procedure and was obtained as a white solid (19.1 mg, 0.095 mmol, 95 %).

$^1\text{H NMR}$  ( $\text{CDCl}_3$ , 200 MHz, 25°C):  $\delta$  8.19 (s, 1H), 7.9 (m, 2H), 7.47 – 7.43 (m, 3H), 4.37 – 4.27 (q, 2H), 1.37 – 1.30 (t, 3H). ESI-MS:  $[\text{M}+\text{H}]^+$  202.08 m/z.

### 2.2.2 Benzylidenemalononitrile

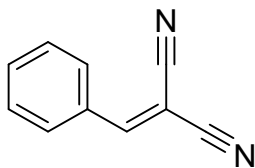

Benzylidenemalononitrile was prepared from benzaldehyde (0.12 mmol) and malononitrile (0.1 mmol) following the general procedure and was obtained as a yellowish solid (15.2 mg, 0.099 mmol, 99 %).

$^1\text{H NMR}$  ( $\text{CDCl}_3$ , 200 MHz,  $25^\circ\text{C}$ ):  $\delta$  7.86 – 7.82 (m, 2H), 7.71 (s, 1H), 7.57 – 7.43 (m, 3H). ESI-MS:  $[\text{M}+\text{H}]^+$  155.03 m/z.

### 2.2.3 Ethyl 2-cyano-3-(4-methoxyphenyl)acrylate

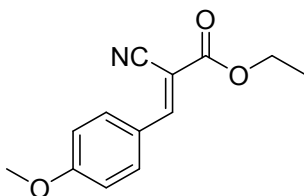

Ethyl 2-cyano-3-(4-methoxyphenyl)acrylate was prepared from anisaldehyde (0.22 mmol) and ethyl cyanoacetate (0.2 mmol) using 20 mg of Cu powder, stirring 16 h in EtOH at  $56^\circ\text{C}$  and was obtained as a white solid (45.3 mg, 0.196 mmol, 98 %).

$^1\text{H NMR}$  ( $\text{CDCl}_3$ , 200 MHz,  $25^\circ\text{C}$ ):  $\delta$  8.10 (s, 1H), 7.95 – 7.91 (m, 2H), 6.94 – 6.90 (m, 2H), 4.35 – 4.25 (q, 2H), 3.82 (s, 3H), 1.37 – 1.30 (t, 3H). ESI-MS:  $[\text{M}+\text{H}]^+$  232.07 m/z.

### 2.2.4 Ethyl (2-cyano-3-(4-nitrophenyl)acrylate

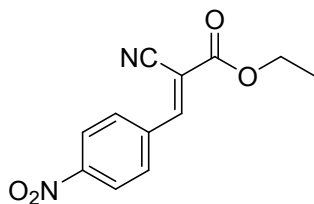

Ethyl (2-cyano-3-(4-nitrophenyl)acrylate was prepared from 4-nitrobenzaldehyde (0.22 mmol) and ethyl cyanoacetate (0.2 mmol) using 20 mg of Cu powder, stirring 16 h in EtOH at 56 °C and was obtained as a white solid (42.8 mg, 0.174 mmol, 86 %).

$^1\text{H NMR}$  ( $\text{CDCl}_3$ , 200 MHz, 25°C):  $\delta$  8.31 (s, 1H), 8.24 (m, 2H), 8.09 – 8.04 (m, 2H), 4.41 – 4.30 (q, 2H), 1.39 – 1.32 (t, 3H). ESI-MS:  $[\text{M}]^-$  246.03 m/z.

### 2.2.5 Ethyl 2-cyano-5-phenylpenta-2,4-dienoate

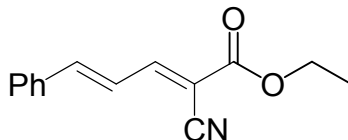

Ethyl 2-cyano-5-phenylpenta-2,4-dienoate was prepared from cinnamic aldehyde (0.22 mmol) and ethyl cyanoacetate (0.2 mmol) using 20 mg of Cu powder, stirring 16 h in EtOH at 56 °C and was obtained as a yellow solid (39.4 mg, 0.174 mmol, 86 %).

$^1\text{H NMR}$  ( $\text{CDCl}_3$ , 200 MHz, 25°C):  $\delta$  7.95 (m, 1H), 8.24 (m, 2H), 7.50 (m, 2H), 7.37-7.22 (m, 5H), 4.33 – 4.22 (q, 2H), 1.34 – 1.27 (t, 3H). ESI-MS:  $[\text{M}+\text{Na}]^+$  250.09 m/z.



### 2.2.6 Ethyl 3-(anthracen-9-yl)-2-cyanoacrylate

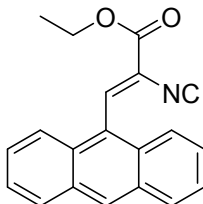

Ethyl 3-(anthracen-9-yl)-2-cyanoacrylate was prepared from anthracene aldehyde (0.22 mmol) and ethyl cyanoacetate (0.2 mmol) using 20 mg of Cu powder, stirring 15 h in DMSO at 70 °C and was obtained as a yellow solid (19.3 mg, 0.064 mmol, 32 %).

$^1\text{H NMR}$  ( $\text{CDCl}_3$ , 200 MHz, 25°C):  $\delta$  9.24 (s, 1H), 8.51 (s, 1H), 8.02-7.87 (m, 4H), 7.46 (m, H), 4.49 – 4.38 (q, 2H), 1.45 – 1.38 (t, 3H). ESI-MS:  $[\text{M}+\text{Na}]^+$  324.01 m/z.

### 2.2.7 Ethyl 3-([1,1'-biphenyl]-4-yl)-2-cyanoacrylate

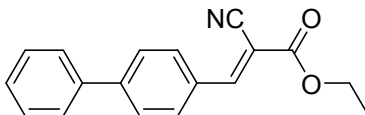

Ethyl 3-([1,1'-biphenyl]-4-yl)-2-cyanoacrylate was prepared from biphenyl aldehyde (0.22 mmol) and ethyl cyanoacetate (0.2 mmol) using 20 mg of Cu powder, stirring 16 h in EtOH at 56 °C and was obtained as a yellow solid (30.5 mg, 0.11 mmol, 54 %).

$^1\text{H NMR}$  ( $\text{CDCl}_3$ , 200 MHz, 25°C):  $\delta$  8.21 (s, 1H), 8.00 (s, 1H), 7.59-7.34 (m, 8H), 4.39 – 4.28 (q, 2H), 1.38 – 1.31 (t, 3H). ESI-MS:  $[\text{M}+\text{H}]^+$  278.04 m/z.

### 2.2.8 2-cyano-3-phenylacrylamide

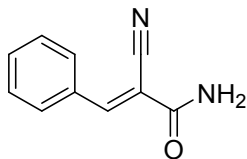

2-cyano-3-phenylacrylamide was prepared from benzaldehyde (0.22 mmol) and cyano acetamide (0.2 mmol) using 20 mg of Cu powder, stirring 16 h in EtOH at 56 °C and was obtained as a yellow solid (29.2 mg, 0.17 mmol, 85 %).

<sup>1</sup>H NMR (CDCl<sub>3</sub>, 200 MHz, 25°C): δ 8.25 (s, 1H), 7.88 (m, 2H), 7.47 (m, 3H), 6.29 – 6.05 (br, 2H). ESI-MS: [M+H]<sup>+</sup> 173.06 m/z.

### 2.2.9 ethyl-3-(4-bromophenyl)-2-cyanoacrylate

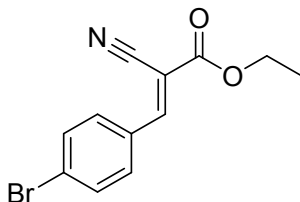

Ethyl-3-(4-bromophenyl)-2-cyanoacrylate was prepared from 4-bromobenzaldehyde (0.22 mmol) and ethyl cyanoacetate (0.2 mmol) using 20 mg of Cu powder, stirring 6 h in EtOH at 56 °C and was obtained as a white solid after recrystallization in EtOH (38.2 mg, 68 %).

<sup>1</sup>H NMR (CDCl<sub>3</sub>, 200 MHz, 25°C): δ 8.11 (s, 1H), 7.81 – 7.77 (m, 2H), 7.60 – 7.55 (m, 2H), 4.37 – 4.25 (q, 2H), 1.37 – 1.30 (t, 3H). ESI-MS: [M+H]<sup>+</sup> 280.01, 282.03 m/z.

### 2.2.10 ethyl-3-(4-chlorophenyl)-2-cyanoacrylate

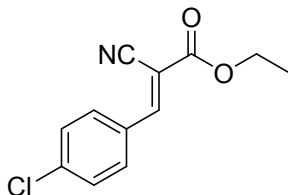

Ethyl-3-(4-chlorophenyl)-2-cyanoacrylate was prepared from 4-chlorobenzaldehyde (0.22 mmol) and ethyl cyanoacetate (0.2 mmol) using 20 mg of Cu powder, stirring 6 h in EtOH at 56 °C and was obtained as a off-white solid after recrystallization in EtOH (34 mg, 72 %).

$^1\text{H}$  NMR ( $\text{CDCl}_3$ , 200 MHz, 25°C):  $\delta$  8.13 (s, 1H), 7.89 – 7.85 (m, 2H), 7.44 – 7.39 (m, 2H), 4.38 – 4.28 (q, 2H), 1.37 – 1.30 (t, 3H).  
ESI-MS:  $[\text{M}+\text{H}]^+$  236.04 m/z.

### 2.2.11 ethyl-3-(4-iodophenyl)-2-cyanoacrylate

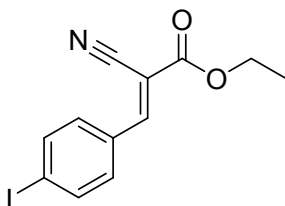

Ethyl-3-(4-iodophenyl)-2-cyanoacrylate was prepared from 4-iodobenzaldehyde (0.22 mmol) and ethyl cyanoacetate (0.2 mmol) using 20 mg of Cu powder, stirring 6 h in EtOH at 56 °C and was obtained as a white solid after recrystallization in EtOH (61.1 mg, 93 %).

$^1\text{H}$  NMR ( $\text{CDCl}_3$ , 200 MHz, 25°C):  $\delta$  8.09 (s, 1H), 7.77 – 7.64 (m, 2H), 7.60 – 7.55 (m, 2H), 4.37 – 4.26 (q, 2H), 1.36 – 1.29 (t, 3H).  
ESI-MS:  $[\text{M}+\text{H}]^+$  328 m/z.

### 2.2.12 2,2'-(phenylmethylene)bis(3-hydroxycyclohex-2-en-1-one)

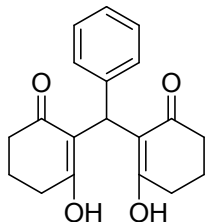

2,2'-(phenylmethylene)bis(3-hydroxycyclohex-2-en-1-one) was prepared from 4-benzaldehyde (0.22 mmol) and cyclohexa-1,3-dione (0.4 mmol) using 20 mg of Cu powder, stirring 6 h in DMF at 56 °C and was obtained as a off-white solid after recrystallization in EtOH (60.6 mg, 97 %). This solid product was not soluble anymore, so no NMR-spectra could be obtained.

ESI-MS:  $[M+H]^+$  313 m/z.

### 2.2.13 2,2'-(phenylmethylene)bis(3-hydroxy-5,5-dimethylcyclohex-2-en-1-one)

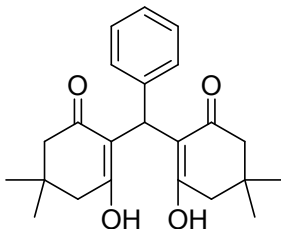

2,2'-(phenylmethylene)bis(3-hydroxy-5,5-dimethylcyclohex-2-en-1-one) was prepared from benzaldehyde (0.2 mmol) and 5,5-dimethylcyclohexane-1,3-dione (0.4 mmol) using 20 mg of Cu powder, stirring 6 h in DMF at 56 °C and was obtained as a white solid after recrystallization in EtOH (66 mg, 89 %).

$^1\text{H}$  NMR ( $\text{CDCl}_3$ , 200 MHz, 25°C):  $\delta$  7.23 – 7.00 (m, 5H), 5.47 (s, 1H), 2.33 – 2.07 (m, 8H), 1.16 – 1.03 (m, 12H).

ESI-MS:  $[M+H]^+$  369.2 m/z.

### 3. Copper catalyst properties

**Table 2.** Overview of the copper(0) containing catalysts and their properties.

| Entry | Catalyst                           | Abbreviation | Colour | Size (nm) | Shape         | BET SA (m <sup>2</sup> g <sup>-1</sup> ) |
|-------|------------------------------------|--------------|--------|-----------|---------------|------------------------------------------|
| 1     | copper powder dendritic            | Cu(D)        | red    | 500-1000  | dendritic     | 0.2                                      |
| 2     | copper nanoparticles A             | Cu(NPA)      | brown  | 40-60     | spherical     | 4.2                                      |
| 3     | copper nanoparticles B             | Cu(NPB)      | black  | 20-50     | spherical     | 15.9                                     |
| 4     | carbon-coated-copper nanoparticles | Cu(C)        | black  | 5-50      | spherical     | 61.1                                     |
| 5     | copper hollow spheres              | Cu(Hol)      | black  | 1000-1500 | hollow sphere | 2.1                                      |

#### 4. Catalytic cycles and kinetic figures

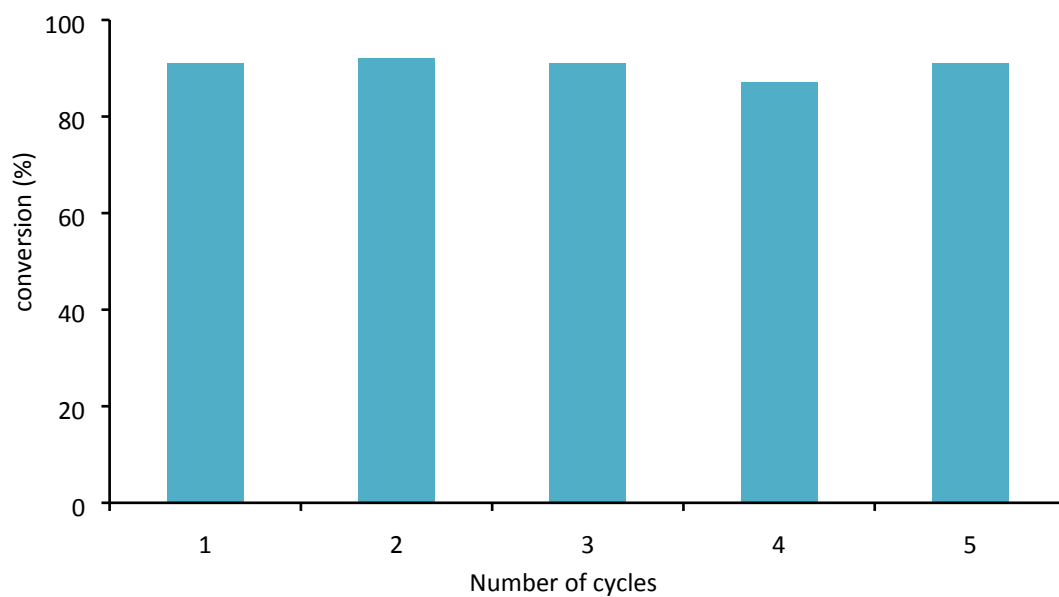

**Figure 1.** Conversion of the condensation between benzaldehyde (0.1 mMol) and ethyl-cyanoacetate (0.1 mMol) in 1 ml DMSO with 4 mg Cu @56 °C after 1 h. 5 successive cycles using the same catalyst.

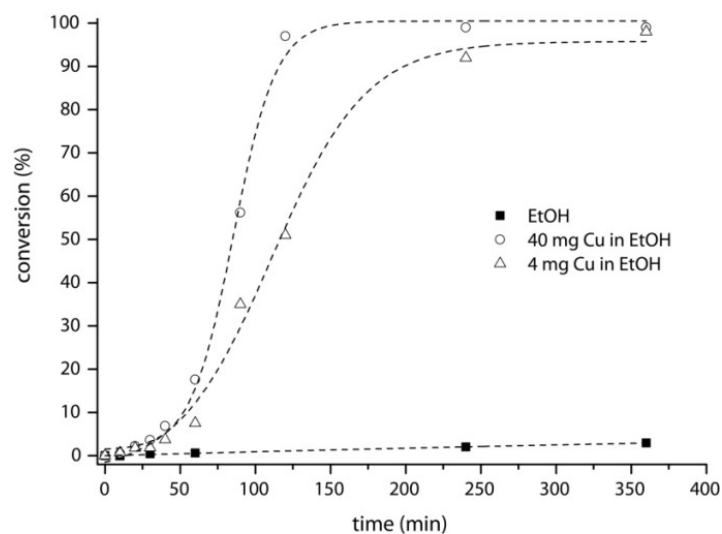

**Figure 2.** Knoevenagel condensation of benzaldehyde (0.2 mmol) and ethyl cyanoacetate (0.1 mmol) with dendritic copper powder at 56 °C: No visible reaction without catalyst was detected.

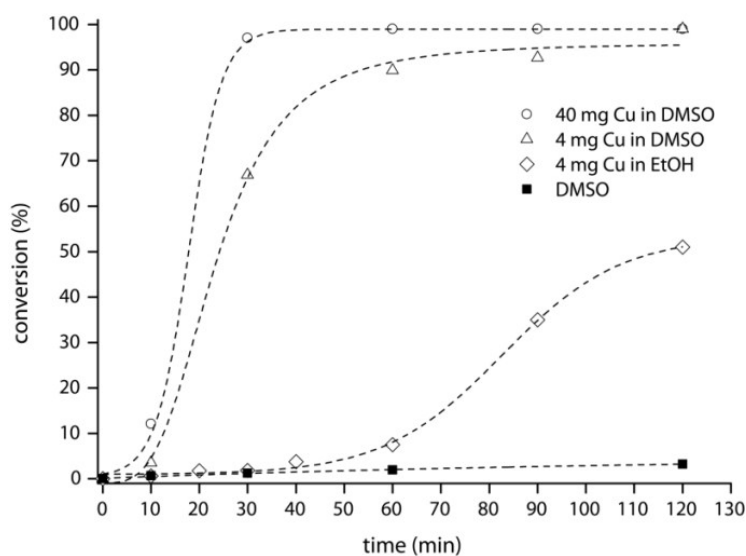

**Figure 3.** Knoevenagel condensation of benzaldehyde (0.2 mmol) and ethyl cyanoacetate (0.1 mmol) with dendritic copper powder at 56 °C. Nearly linear conversion with Ethanol, zero order kinetics fit.

## 5. SEM micrographs

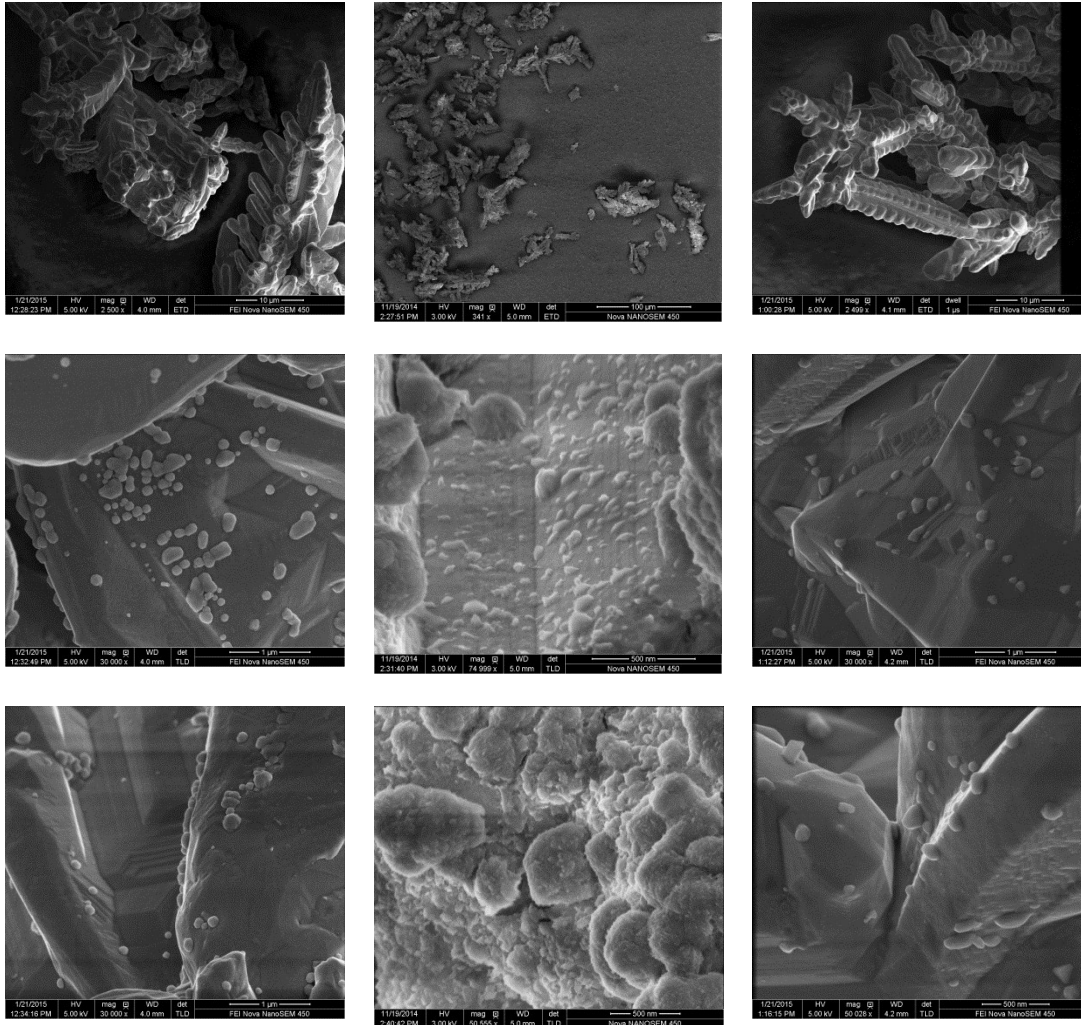

Untreated Cu(0) powder

Cu(0) after catalysis (washed)

Cu(0) after 16 h at 56°C in EtOH

**Figure 4.** SEM micrographs showing Cu(0) powder at different stages of the catalysis.



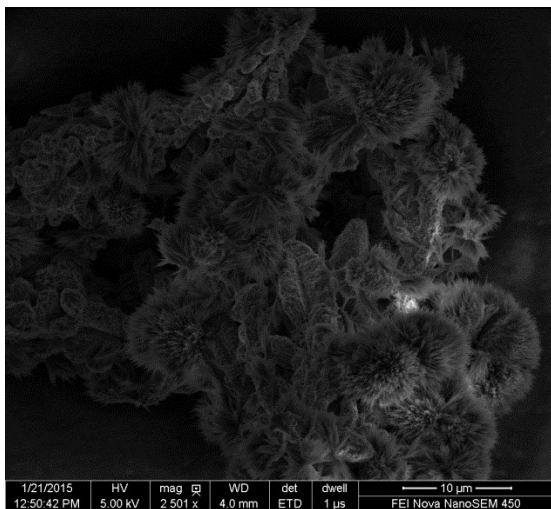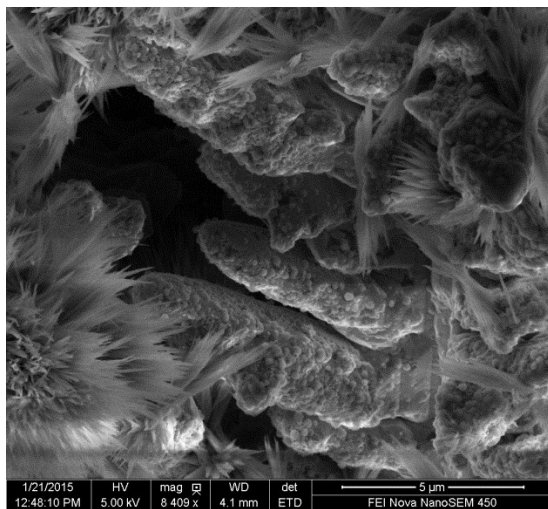

**Figure 5.** Cu(0) powder after catalysis in cold ethanol: product crystal formation visible on copper surface

## 6. Scale up documentation

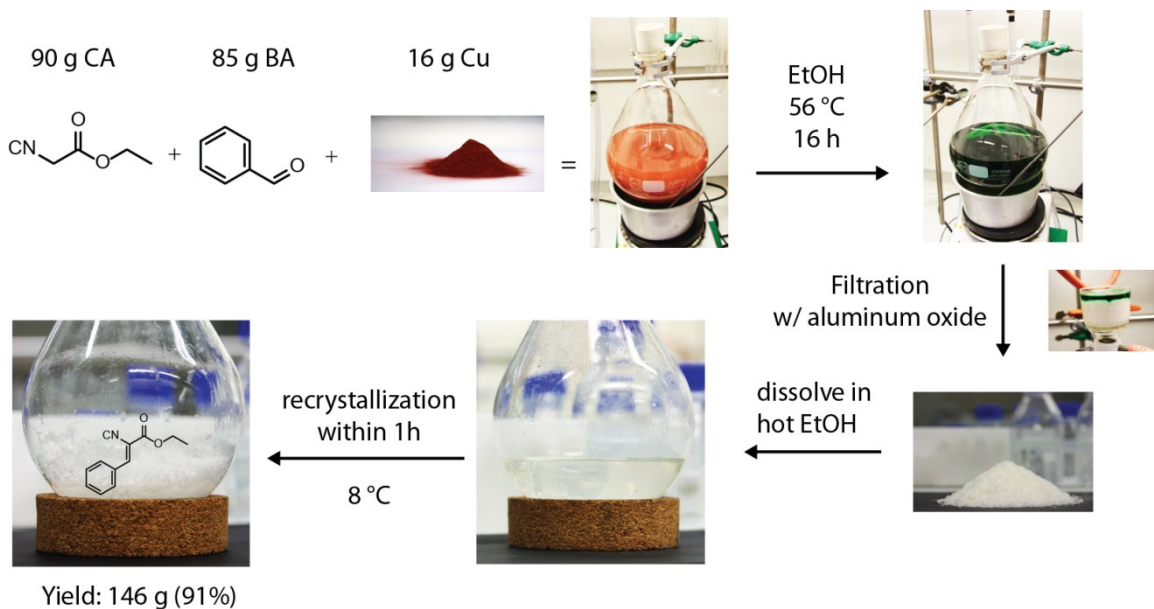

**Figure 6.** Scale up experiment: Knoevenagel condensation of benzaldehyde (81.2 mL, 0.8 mol) and ethyl cyanoacetate (84.8 mL, 0.8 mol) in 1000 mL EtOH with 16 g copper catalyst . Yield after recrystallization : 146 g (91 %).

## 7. XRD Measurement

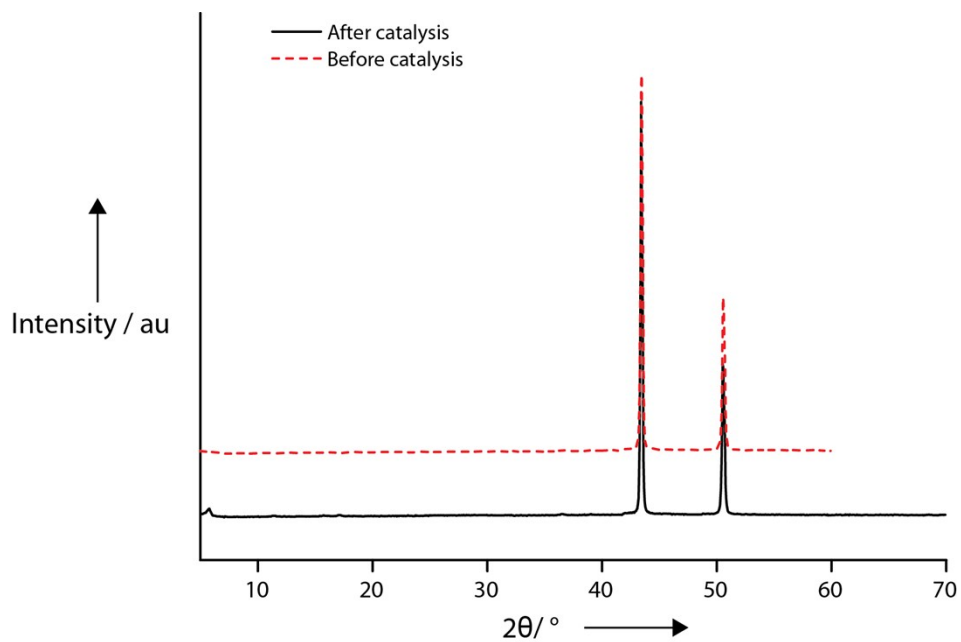

**Figure 7.** XRD measurement of the Cu powder used in the scale up experiment before (red, dashed line) and after (black, solid line).

## 8. NMR spectra

### 8.1 Ethyl (Z)-2-cyano-3-phenylacrylate in CDCl<sub>3</sub>

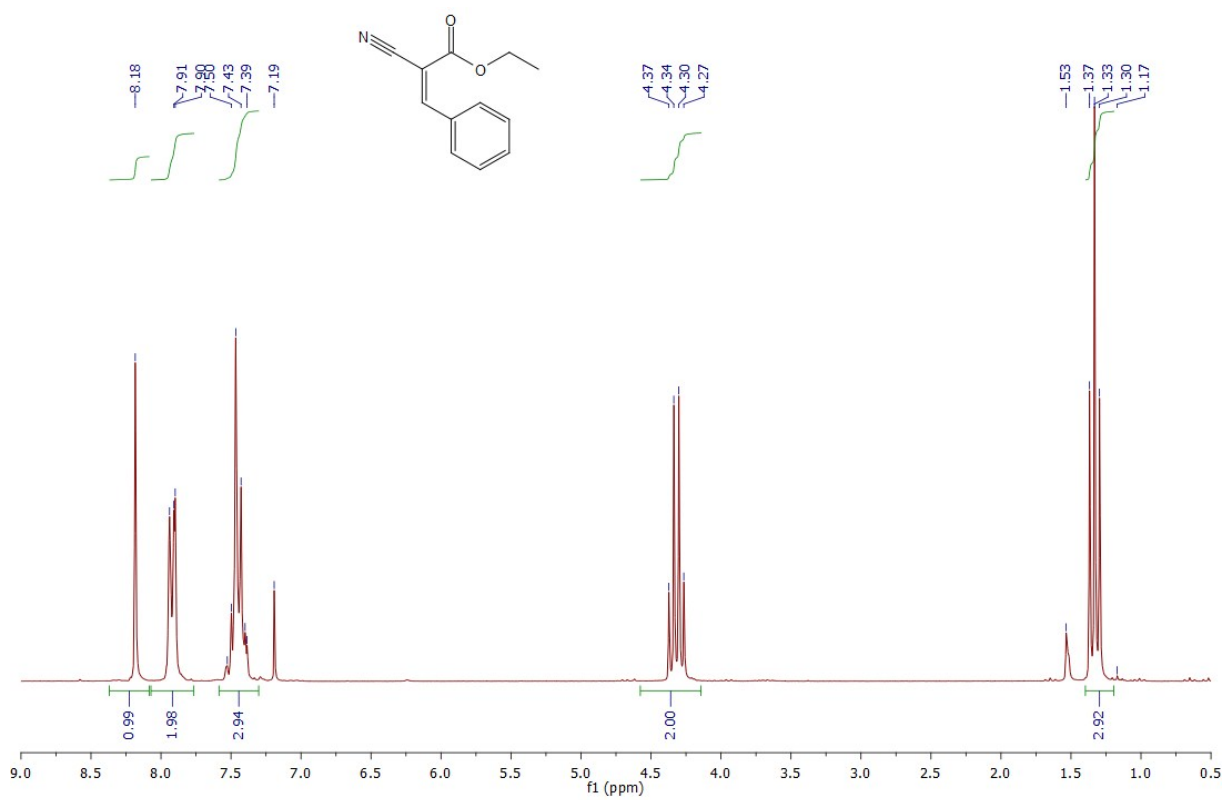

## 8.2 Benzylidenemalononitrile in CDCl<sub>3</sub>

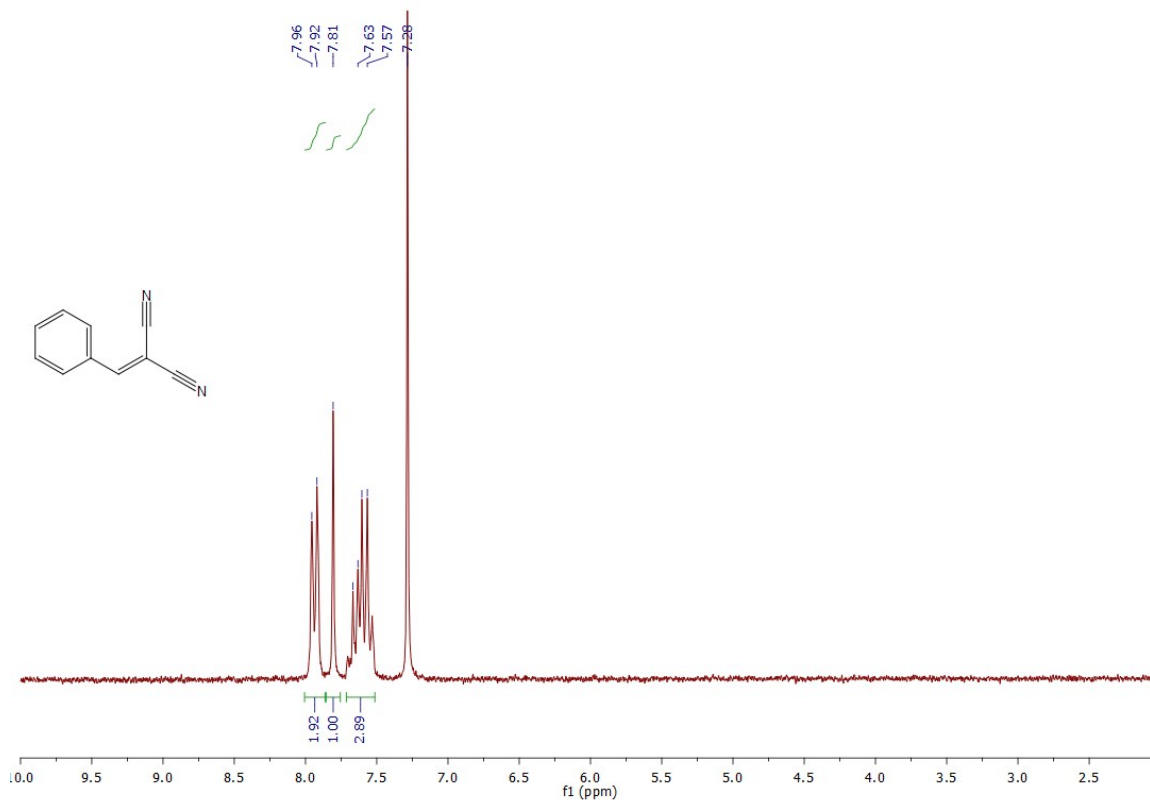

### 8.3 Ethyl 2-cyano-3-(4-methoxyphenyl)acrylate

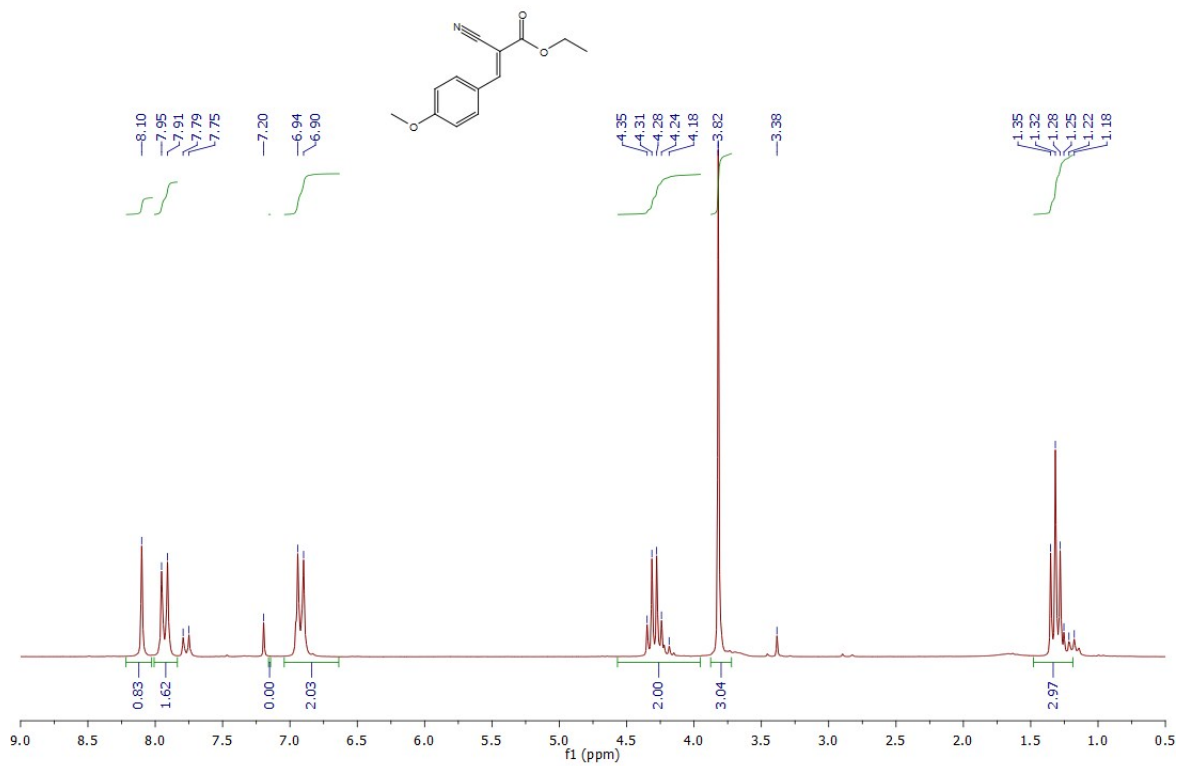

## 8.4 Ethyl (2-cyano-3-(4-nitrophenyl)acrylate

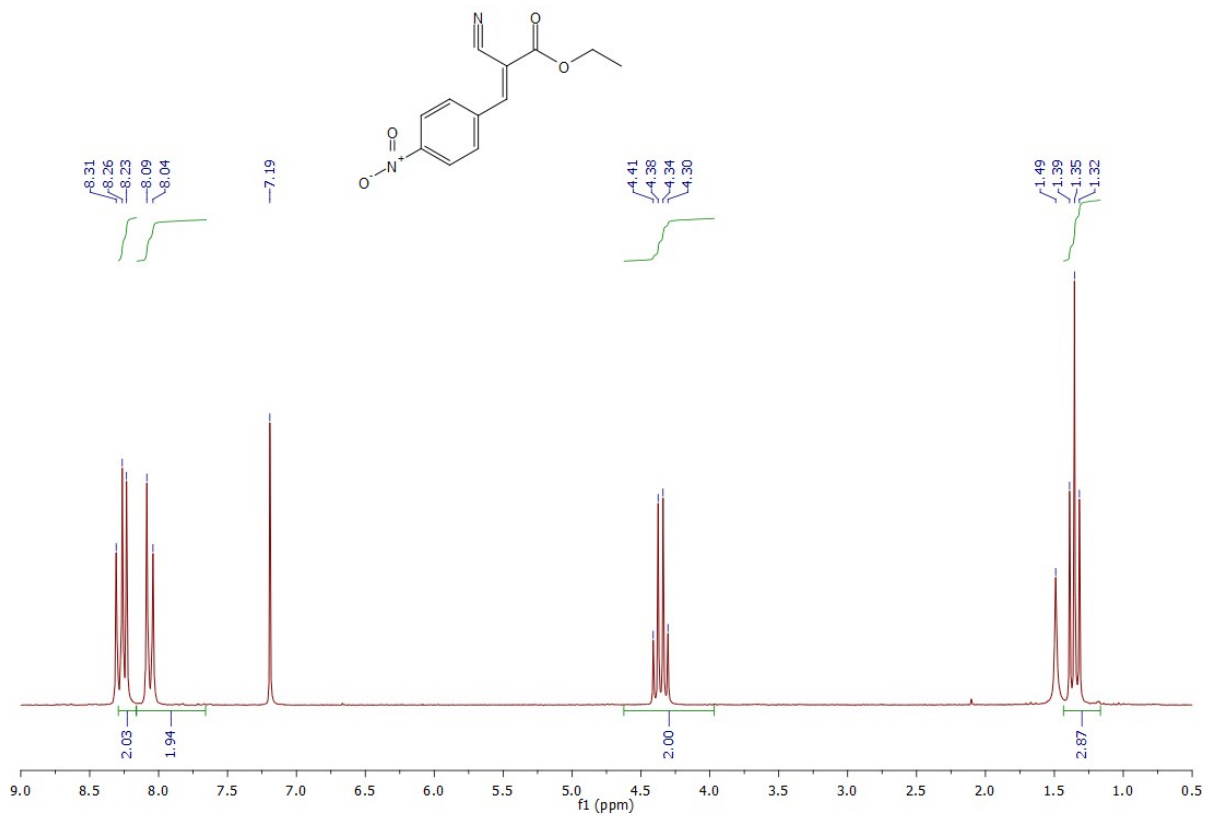

## 8.5 Ethyl 2-cyano-5-phenylpenta-2,4-dienoate

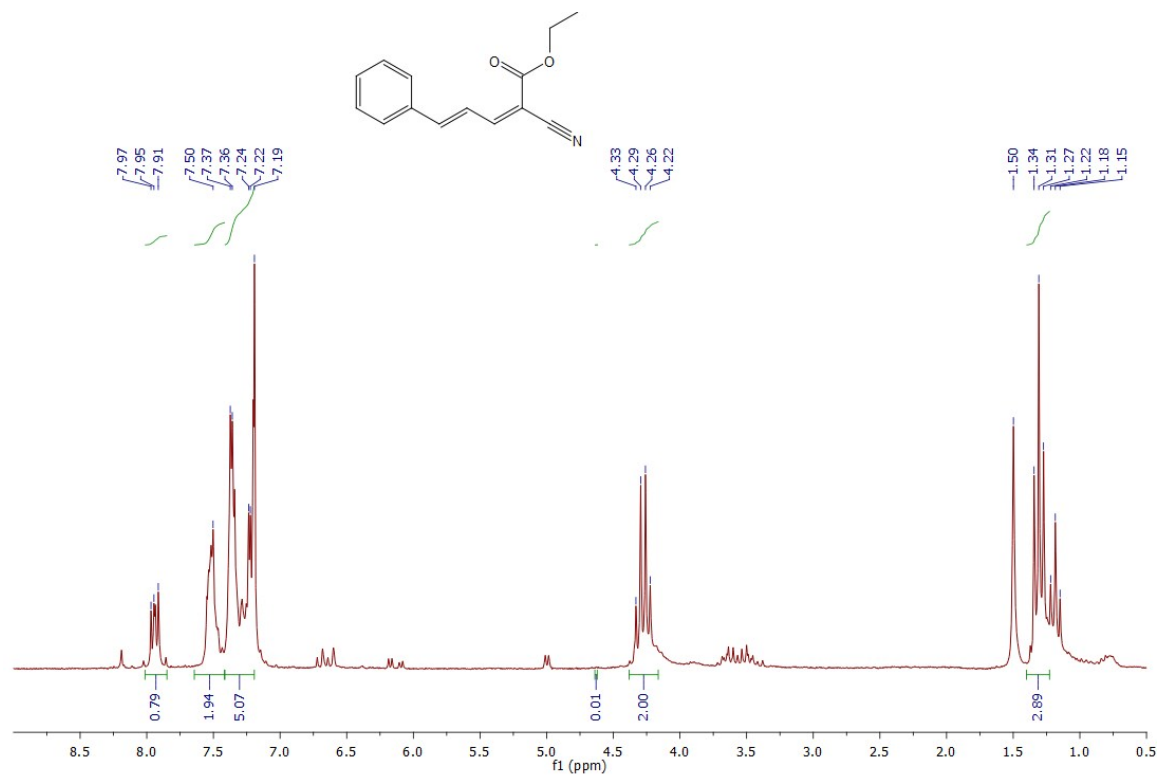



## 8.6 Ethyl 3-(anthracen-9-yl)-2-cyanoacrylate

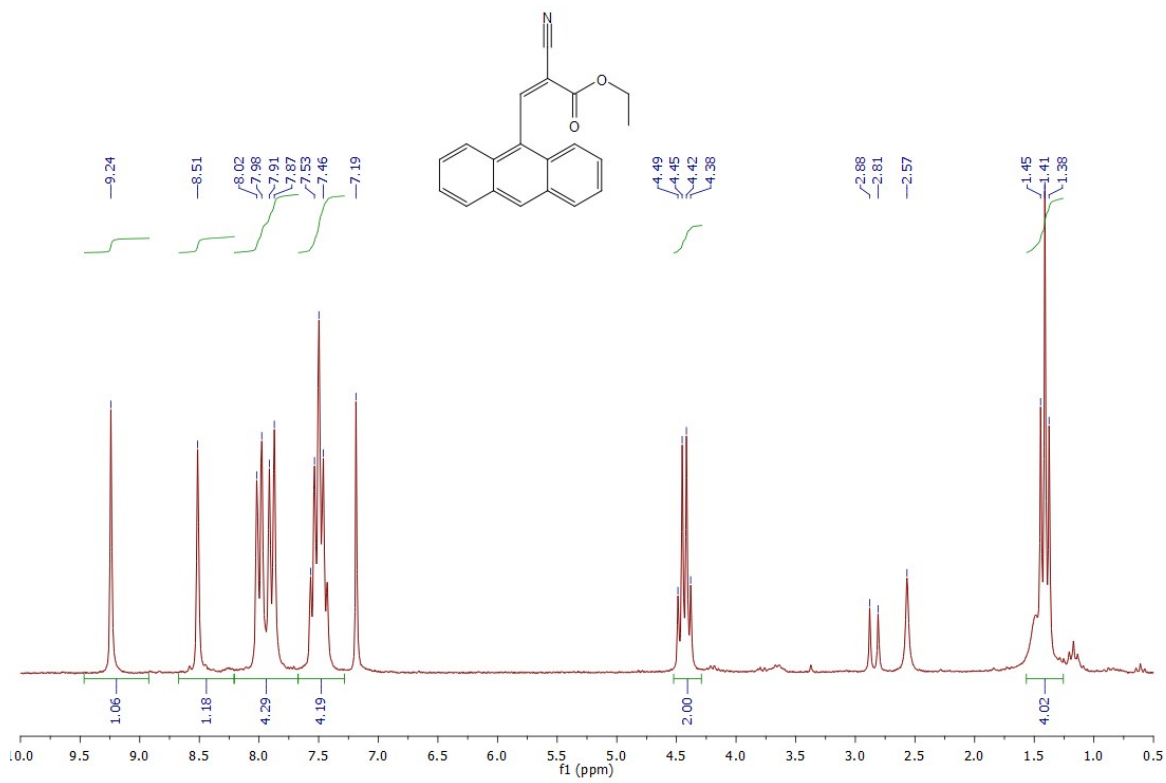

## 8.7 Ethyl 3-([1,1'-biphenyl]-4-yl)-2-cyanoacrylate

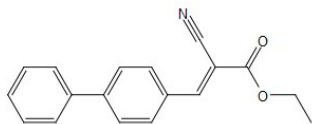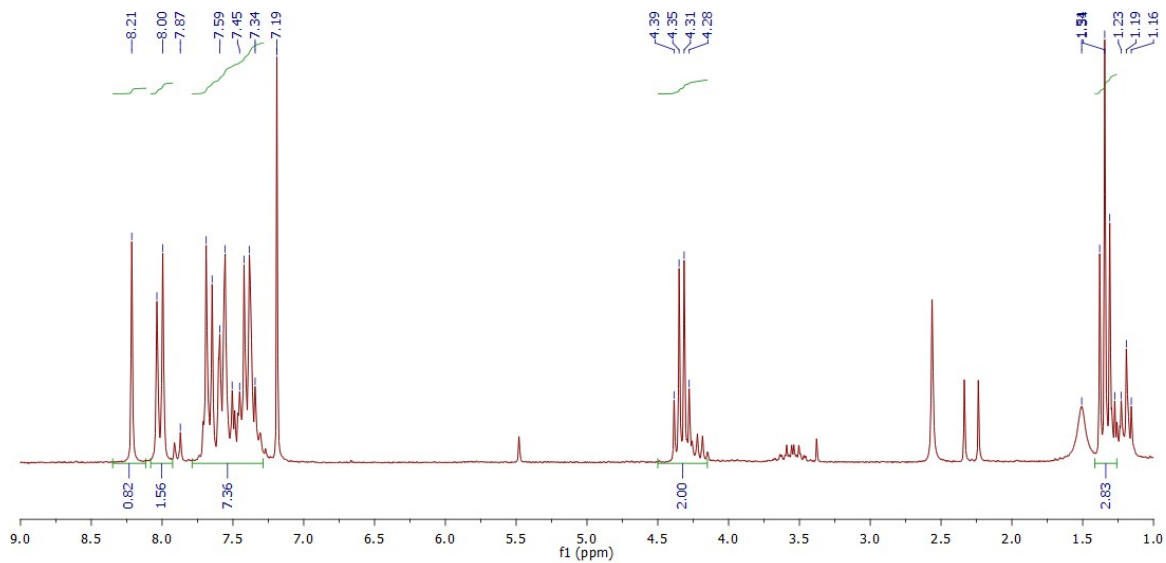

## 8.8. 2-cyano-3-phenylacrylamide

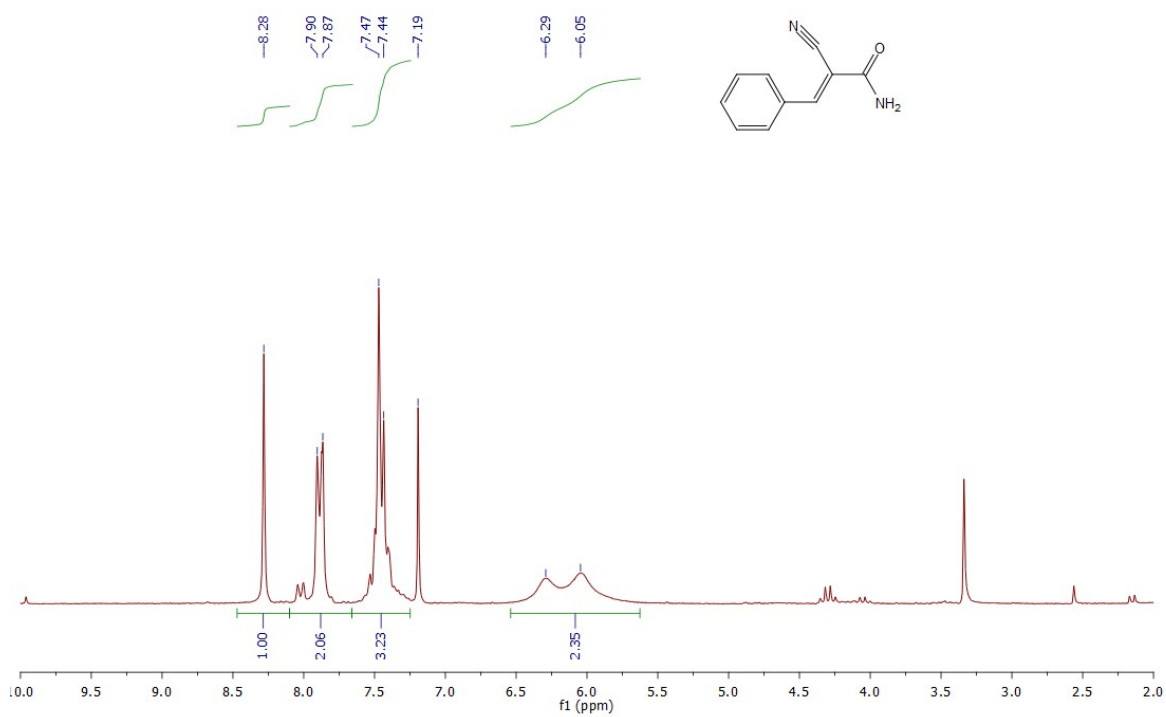

### 8.9. ethyl-3-(4-bromophenyl)-2-cyanoacrylate

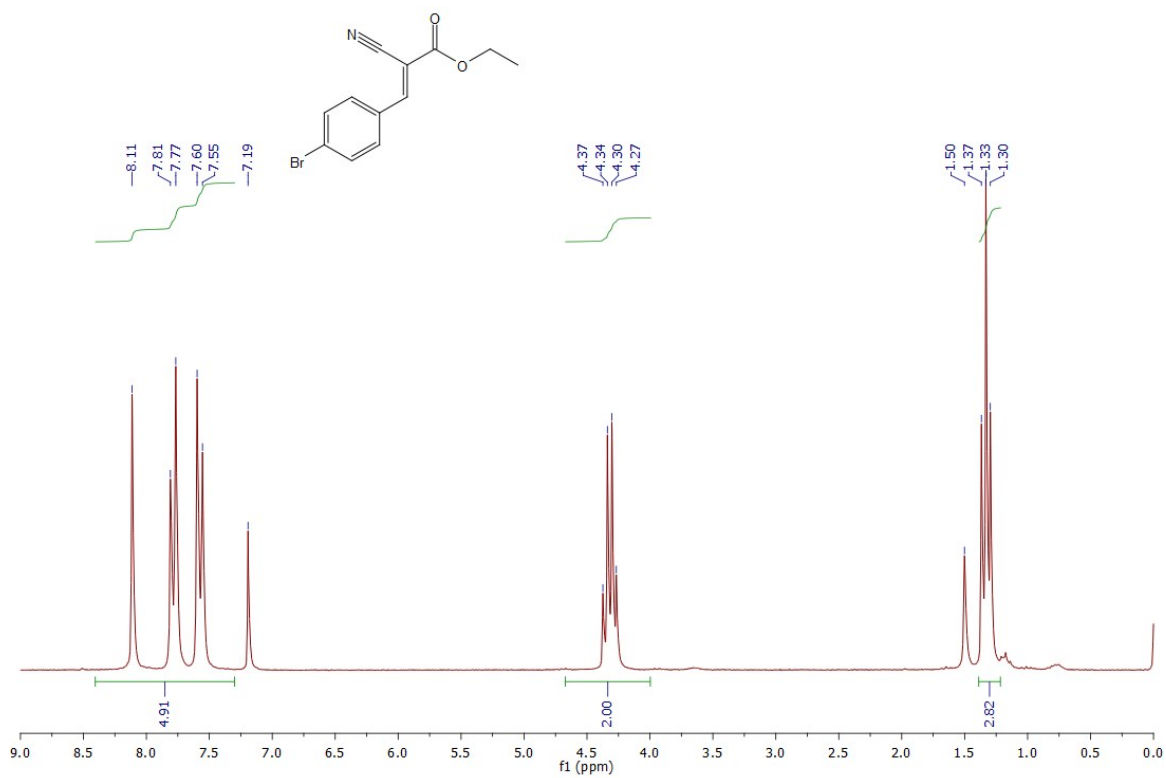

### 8.10. ethyl-3-(4-chlorophenyl)-2-cyanoacrylate

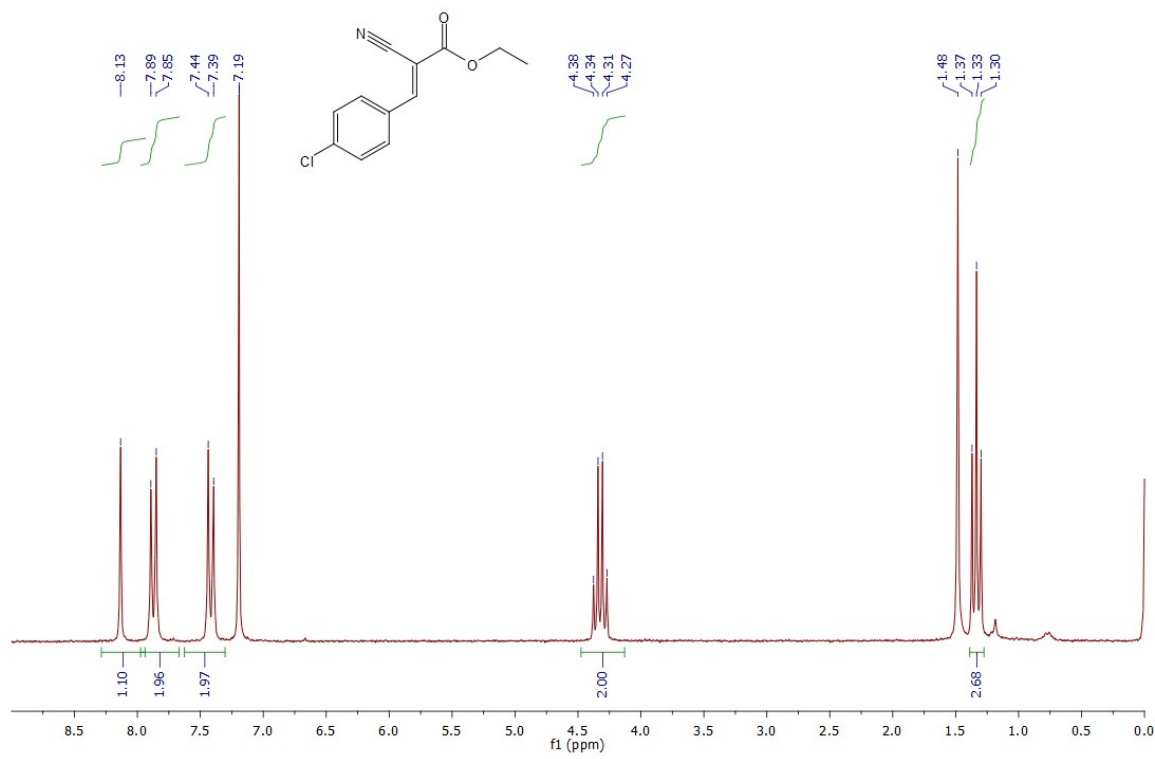

### 8.11 ethyl-3-(4-iodophenyl)-2-cyanoacrylate

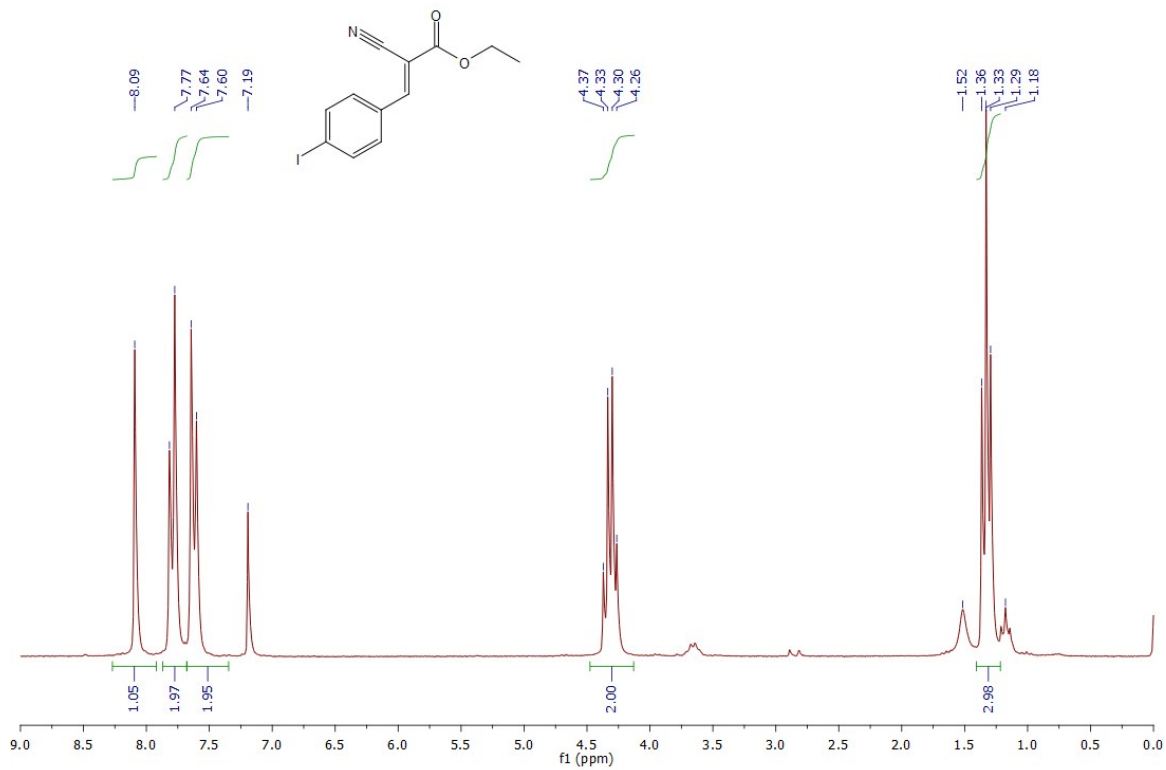

### 8.12 2,2'-(phenylmethylene)bis(3-hydroxy-5,5-dimethylcyclohex-2-en-1-one)

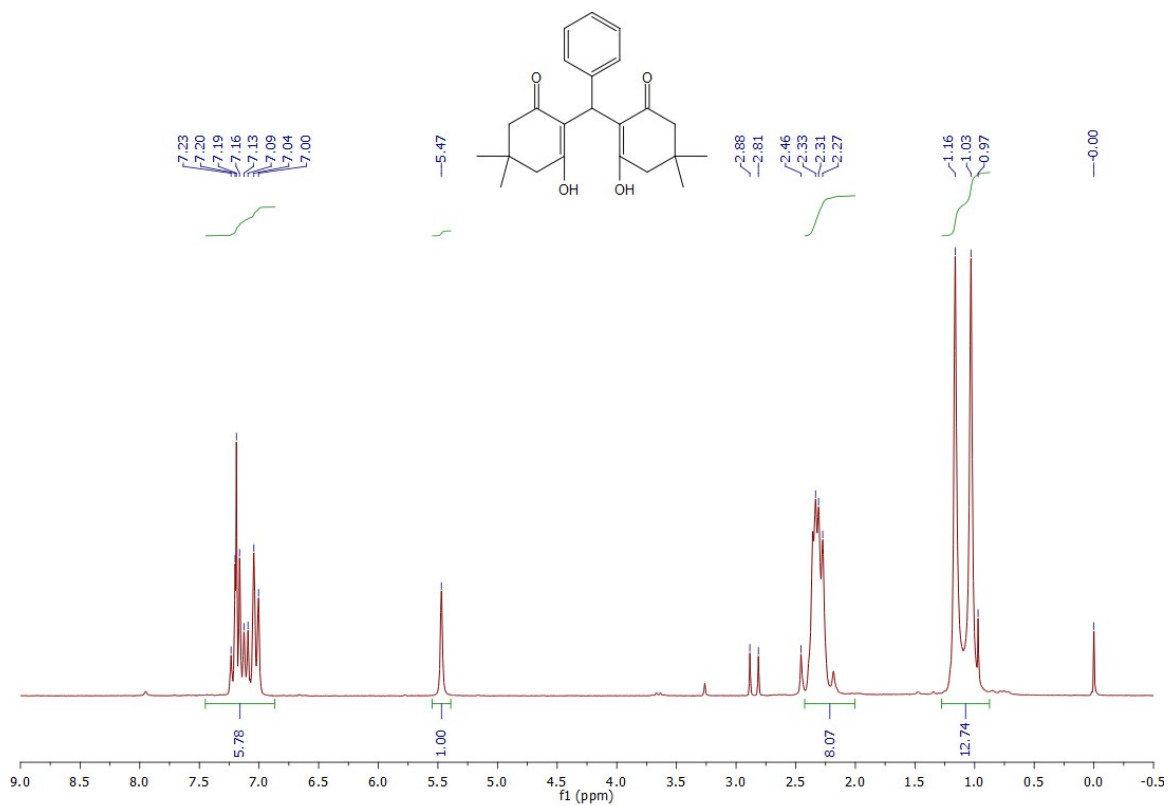

Supplement: c5cc02541a1.pdf [file c5cc02541a1.pdf]
